# Supplementary material for: Transcriptomic Analysis of the Activity of a Novel Polymyxin against Staphylococcus aureus
Source: PubMed Central journal article supplement (PMC4963539; doi:10.1128/msphere.00119-16), 2016-07-27
Supplement: sph004162117st1.pdf [file sph004162117st1.pdf]

**Supplementary Table S1:** Full list of differentially regulated genes with their respective expression ratio expressed in log<sub>2</sub>, false discovery rate (FDR), annotation, and pathway.

| Gene        | Expression ratio(log <sub>2</sub> ) | FDR      | Protein/ortholog                                                      | Pathway                                                                                                              |
|-------------|-------------------------------------|----------|-----------------------------------------------------------------------|----------------------------------------------------------------------------------------------------------------------|
| <i>butA</i> | 1.71                                | 2.36E-14 | Acetoin reductase                                                     | Butanoate metabolism                                                                                                 |
| <i>metE</i> | 2.23                                | 3.03E-13 | 5-methyltetrahydropteroyltriglutamate- Homocysteine methyltransferase | Cysteine and methionine metabolism                                                                                   |
| <i>gltB</i> | 1.92                                | 4.08E-16 | Glutamate synthase large subunit                                      | Alanine, aspartate and glutamate metabolism                                                                          |
| <i>gltD</i> | 1.84                                | 1.10E-14 | NADH-glutamate synthase small subunit                                 | Nitrogen metabolism                                                                                                  |
| <i>oppB</i> | 1.65                                | 3.58E-13 | Oligopeptide transport system permease protein                        | Beta-Lactam resistance                                                                                               |
| <i>oppC</i> | 1.73                                | 1.21E-12 | Oligopeptide transport system permease protein                        | ABC transporters                                                                                                     |
| <i>oppD</i> | 1.70                                | 6.86E-14 | Oligopeptide transport system ATP-binding protein                     |                                                                                                                      |
| <i>oppF</i> | 1.64                                | 1.73E-12 | Oligopeptide transport system ATP-binding protein                     |                                                                                                                      |
| <i>oppA</i> | 1.67                                | 1.04E-13 | Similar to peptide binding protein                                    |                                                                                                                      |
| <i>dhoM</i> | 2.63                                | 2.94E-14 | Homoserine dehydrogenase                                              | Glycine, serine and threonine metabolism                                                                             |
| <i>thrC</i> | 2.17                                | 3.24E-13 | Threonine synthase                                                    |                                                                                                                      |
| <i>thrB</i> | 2.27                                | 7.45E-14 | Homoserine kinase homolog                                             |                                                                                                                      |
| <i>citC</i> | 1.99                                | 2.12E-14 | Isocitrate dehydrogenase                                              | Citrate cycle                                                                                                        |
| <i>citZ</i> | 2.01                                | 4.13E-15 | Citrate synthase II                                                   | Glutathione metabolism                                                                                               |
| <i>serA</i> | 1.67                                | 1.38E-11 | D-3-phosphoglycerate dehydrogenase                                    | Glycine, serine and threonine metabolism                                                                             |
| <i>vraS</i> | 2.33                                | 6.29E-14 | Two-component sensor histidine kinase                                 | Two-component system                                                                                                 |
| <i>vraR</i> | 2.29                                | 9.77E-14 | Two-component response regulator                                      |                                                                                                                      |
| <i>ilvD</i> | 3.49                                | 7.03E-13 | Dihydroxy-acid dehydratase                                            | Valine, leucine and isoleucine biosynthesis                                                                          |
| <i>ilvB</i> | 3.33                                | 1.63E-13 | Acetolactate synthase large subunit                                   |                                                                                                                      |
| <i>ilvC</i> | 5.21                                | 6.60E-14 | Alpha-keto-beta-hydroxylacil reductoisomerase                         |                                                                                                                      |
| <i>leuA</i> | 4.53                                | 9.77E-14 | 2-isopropylmalate synthase                                            |                                                                                                                      |
| <i>leuB</i> | 4.30                                | 5.27E-14 | 3-isopropylmalate dehydrogenase                                       |                                                                                                                      |
| <i>leuC</i> | 4.02                                | 1.66E-14 | 3-isopropylmalate dehydratase large subunit                           |                                                                                                                      |
| <i>leuD</i> | 3.71                                | 5.62E-13 | 3-isopropylmalate dehydratase small subunit                           |                                                                                                                      |
| <i>ilvA</i> | 3.17                                | 9.56E-14 | Threonine dehydratase                                                 |                                                                                                                      |
| <i>fbp</i>  | 1.79                                | 9.86E-14 | Fructose-bisphosphatase                                               | Glycolysis /Gluconeogenesis                                                                                          |
| <i>geh</i>  | -1.68                               | 9.56E-14 | Glycerol ester hydrolase                                              | Triacylglycerol degradation                                                                                          |
| <i>saeS</i> | -1.96                               | 2.33E-16 | Histidine protein kinase                                              | Two-component system                                                                                                 |
| <i>saeR</i> | -2.01                               | 4.13E-15 | Response regulator                                                    |                                                                                                                      |
| <i>saeP</i> | -2.07                               | 1.06E-13 | Hypothetical protein                                                  |                                                                                                                      |
| <i>saeQ</i> | -3.15                               | 5.93E-17 | Hypothetical protein                                                  |                                                                                                                      |
| <i>qoxC</i> | -1.73                               | 5.24E-15 | Quinol oxidase polypeptide III                                        | Oxidative phosphorylation                                                                                            |
| <i>qoxB</i> | -1.87                               | 9.77E-14 | Quinol oxidase polypeptide I                                          |                                                                                                                      |
| <i>qoxD</i> | -1.75                               | 2.98E-12 | Putative quinol oxidase polypeptide IV QoxD                           |                                                                                                                      |
| <i>sbi</i>  | -2.77                               | 9.85E-14 | IgG-binding protein                                                   | Staphylococcus aureus infection                                                                                      |
| <i>ispD</i> | 1.72                                | 3.82E-10 | Similar to 2-C-methyl-D-erythritol 4-phosphate cytidyltransferase     | Terpenoid backbone biosynthesis                                                                                      |
| <i>prfB</i> | 2.45                                | 3.76E-12 | Peptide chain release factor 2                                        | Macromolecule metabolism                                                                                             |
| <i>pgi</i>  | 1.06                                | 4.26E-13 | Glucose-6-phosphate isomerase A                                       | Glycolysis / Gluconeogenesis                                                                                         |
| <i>folD</i> | 1.10                                | 1.68E-11 | FolD bifunctional protein                                             | One carbon pool by folate<br>Metabolic pathways<br>Microbial metabolism in diverse environments<br>Carbon metabolism |
| <i>kata</i> | 1.22                                | 5.13E-10 | Catalase                                                              | Tryptophan metabolism                                                                                                |
| <i>rmpG</i> | 1.11                                | 6.91E-08 | 50S ribosomal protein L33                                             | Ribosome                                                                                                             |
| <i>rpsN</i> | 1.06                                | 1.05E-11 | 30S ribosomal protein S14 homolog                                     |                                                                                                                      |
| <i>trpC</i> | 2.00                                | 2.26E-08 | Indole-3-glycerol phosphate synthase                                  | Tryptophan biosynthesis                                                                                              |
| <i>trpF</i> | 1.87                                | 9.38E-07 | Phosphoriborylanthranilate isomerase                                  |                                                                                                                      |
| <i>trpB</i> | 1.60                                | 3.05E-07 | Tryptophan synthase beta chain                                        |                                                                                                                      |
| <i>pstB</i> | 1.53                                | 4.93E-09 | Phosphate ABC transporter                                             | ABC transporters                                                                                                     |
| <i>ctpA</i> | 1.49                                | 3.21E-14 | Probable carboxy-terminal processing proteinase                       | ABC transporters                                                                                                     |
| <i>malA</i> | 1.48                                | 6.17E-12 | Alpha-D-1,4-glucosidase                                               | Galactose metabolism                                                                                                 |
| <i>malR</i> | 1.27                                | 2.05E-10 | Maltose operon transcriptional repressor                              | Starch and sucrose metabolism                                                                                        |
| <i>fhs</i>  | 1.30                                | 9.56E-14 | Formyltetrahydrofolate synthetase                                     | One carbon pool by folate                                                                                            |
| <i>prsA</i> | 1.77                                | 1.11E-13 | Peptidyl-prolyl cis/trans isomerase                                   |                                                                                                                      |
| <i>arg</i>  | 1.32                                | 5.62E-11 | Arginase                                                              | Arginine and proline metabolism                                                                                      |
| <i>lacE</i> | 1.07                                | 3.00E-09 | PTS system lactose-specific IIBC component PTS system                 | Galactose metabolism                                                                                                 |
| <i>lacF</i> | 1.19                                | 1.83E-06 | lactose-specific IIA component                                        | Phosphotransferase system (PTS)                                                                                      |
| <i>lacD</i> | 1.13                                | 3.85E-08 | Tagatose 1,6-diphosphate aldolase                                     |                                                                                                                      |
| <i>lacC</i> | 1.25                                | 4.60E-08 | Tagatose-6-phosphate kinase                                           |                                                                                                                      |
| <i>rocA</i> | 1.81                                | 4.47E-11 | 1-pyrroline-5-carboxylate dehydrogenase                               | Alanine, aspartate and glutamate metabolism<br>Arginine and proline metabolism                                       |
| <i>isaB</i> | 1.33                                | 3.80E-11 | Immunodominant antigen B                                              |                                                                                                                      |
| <i>coa</i>  | -1.19                               | 4.95E-13 | Amino acid permease                                                   | Triacylglycerol degradation                                                                                          |
| <i>rpsF</i> | -1.23                               | 4.26E-08 | 30S ribosomal protein S6                                              | Ribosome                                                                                                             |
| <i>ssb</i>  | -1.28                               | 7.11E-11 | Single-strand DNA-binding protein of phage phi PVL                    | DNA replication                                                                                                      |
| <i>rpsR</i> | -1.31                               | 4.95E-13 | 30S ribosomal protein S18                                             | Mismatch repair<br>Homologous recombination                                                                          |
| <i>nupC</i> | -1.32                               | 9.77E-13 | Pyrimidine nucleoside transport protein                               |                                                                                                                      |

|              |       |          |                                                                    |                                         |
|--------------|-------|----------|--------------------------------------------------------------------|-----------------------------------------|
| <i>rplA</i>  | -1.09 | 1.71E-10 | 50S ribosomal protein L1                                           | Ribosome                                |
| <i>rplJ</i>  | -1.41 | 4.92E-15 | 50S ribosomal protein L10                                          |                                         |
| <i>rplL</i>  | -1.33 | 7.28E-12 | 50S ribosomal protein L7/L12                                       |                                         |
| <i>sdrE</i>  | -1.22 | 9.94E-13 | Ser-Asp rich fibrinogen-binding, bone sialoprotein-binding protein | Staphylococcus aureus infection         |
| <i>nuc</i>   | -2.17 | 2.22E-12 | Staphylococcal nuclease                                            | Staphylococcal nuclease                 |
| <i>potA</i>  | -1.51 | 8.55E-12 | Spermidine/putrescine ABC transporter                              | ABC transporters                        |
| <i>potB</i>  | -1.57 | 6.75E-13 | Spermidine/putrescine ABC transporter                              |                                         |
| <i>potC</i>  | -1.49 | 4.93E-12 | Spermidine/putrescine ABC transporter                              |                                         |
| <i>potD</i>  | -1.35 | 3.24E-13 | Spermidine/putrescine-binding protein precursor                    |                                         |
| <i>rpsP</i>  | -1.21 | 6.21E-11 | 30S ribosomal protein S16                                          | Ribosome                                |
| <i>rimM</i>  | -1.26 | 3.94E-12 | Probable 16S rRNA processing protein                               | Ribosome                                |
| <i>trmD</i>  | -1.28 | 1.04E-13 | tRNA-methyltransferase                                             |                                         |
| <i>rplS</i>  | -1.59 | 7.84E-12 | 50S ribosomal protein L19                                          | Ribosome                                |
| <i>rpmA</i>  | -1.08 | 8.07E-13 | 50S ribosomal protein L27                                          | Ribosome                                |
| <i>rplT</i>  | -1.25 | 2.15E-12 | 50S ribosomal protein L20                                          | Ribosome                                |
| <i>infC</i>  | -1.12 | 4.41E-12 | Translation initiation factor IF-3                                 |                                         |
| <i>ThiI</i>  | -1.13 | 1.43E-10 | Probable thiamine biosynthesis protein                             | Thiamine metabolism                     |
| <i>rpsD</i>  | -1.31 | 5.35E-12 | 30S ribosomal protein S4                                           | Ribosome                                |
| <i>yent2</i> | -1.06 | 6.89E-05 | Enterotoxin                                                        | Staphylococcus aureus infection         |
| <i>sei</i>   | -1.42 | 5.43E-08 | Enterotoxin                                                        |                                         |
| <i>sem</i>   | -1.13 | 3.14E-06 | Enterotoxin                                                        |                                         |
| <i>seo</i>   | -1.55 | 2.72E-10 | Enterotoxin                                                        |                                         |
| <i>tnp</i>   | -1.70 | 6.02E-05 | Transposase                                                        |                                         |
| <i>hly</i>   | -1.66 | 2.82E-13 | Truncated beta-hemolysin                                           | Defence mechanisms<br>Virulence factors |
| <i>czrA</i>  | -1.67 | 1.71E-09 | Repressor protein                                                  |                                         |
| <i>czrB</i>  | -1.49 | 2.85E-10 | Cation-efflux system membrane protein                              |                                         |
| <i>rpsL</i>  | -1.73 | 1.33E-12 | 30S ribosomal protein S9                                           | Ribosome                                |
| <i>rplM</i>  | -1.60 | 4.73E-10 | 50S ribosomal protein L13                                          |                                         |
| <i>rplF</i>  | -1.16 | 1.53E-09 | 50S ribosomal protein L6                                           |                                         |
| <i>fnbB</i>  | -1.37 | 9.08E-12 | Fibronectin-binding protein                                        | Bacterial invasion of epithelial cells  |
