# Supplementary material for: Transcriptomic Analysis of the Activity of a Novel Polymyxin against Staphylococcus aureus
Source: PubMed Central journal article supplement (PMC4963539; doi:10.1128/msphere.00119-16), 2016-07-27
Supplement: sph004162117st2.pdf [file sph004162117st2.pdf]

**Table S2.** MIC checkerboard test of sulfamethoxazol and FADDI-019 in combination against *S. aureus* ATCC 700699.

Sulfamethoxazol

|           | mg/L | 512 | 256 | 128 | 64 | 32  | 16  | 8   | 4   | 2   | 1   | 0   | Blank |
|-----------|------|-----|-----|-----|----|-----|-----|-----|-----|-----|-----|-----|-------|
| FADDI-019 | 128  | -   | -   | -   | -  | -   | -   | -   | -   | -   | -   | -   | -     |
|           | 64   | -   | -   | -   | -  | -   | -   | -   | -   | -   | -   | -   | -     |
|           | 32   | -   | -   | -   | -  | -   | -   | -   | -   | -   | -   | -   | -     |
|           | 16   | -   | -   | -   | -  | -   | -   | -   | -   | -   | -   | -   | -     |
|           | 8    | -   | -   | -   | -  | -   | -   | -   | +   | ++  | ++  | ++  | ++    |
|           | 4    | -   | -   | -   | -  | -   | -   | -   | +   | +   | ++  | +   | ++    |
|           | 2    | -   | -   | -   | ++ | ++  | +   | +++ | +++ | +++ | +++ | +++ | +++   |
|           | 0    | -   | -   | -   | ++ | +++ | +++ | +++ | +++ | +++ | +++ | +++ | +++   |

- OD<sup>620</sup> <0.005; + OD<sup>620</sup> 0.05-0.2; ++ OD<sup>620</sup> 0.2-0.5; +++ OD<sup>620</sup> >0.5.
